# Supplementary material for: Antioxidant, Anti-Tyrosinase and Anti-Inflammatory Activities of Oil Production Residues from Camellia tenuifloria
Source: MDPI journal article supplement (doi:10.3390/ijms161226184), 2015-12-10
Supplement: s1 [file s1]

# Supplementary Materials: Antioxidant, Anti-Tyrosinase, and Anti-inflammatory Activities of Oil Production Residues from *Camellia tenuiflora*

Shu-Yuan Chiou, Choi-Lan Ha, Pei-Shan Wu, Chiu-Ling Yeh, Ying-Shan Su, Man-Po Li and Ming-Jiuan Wu

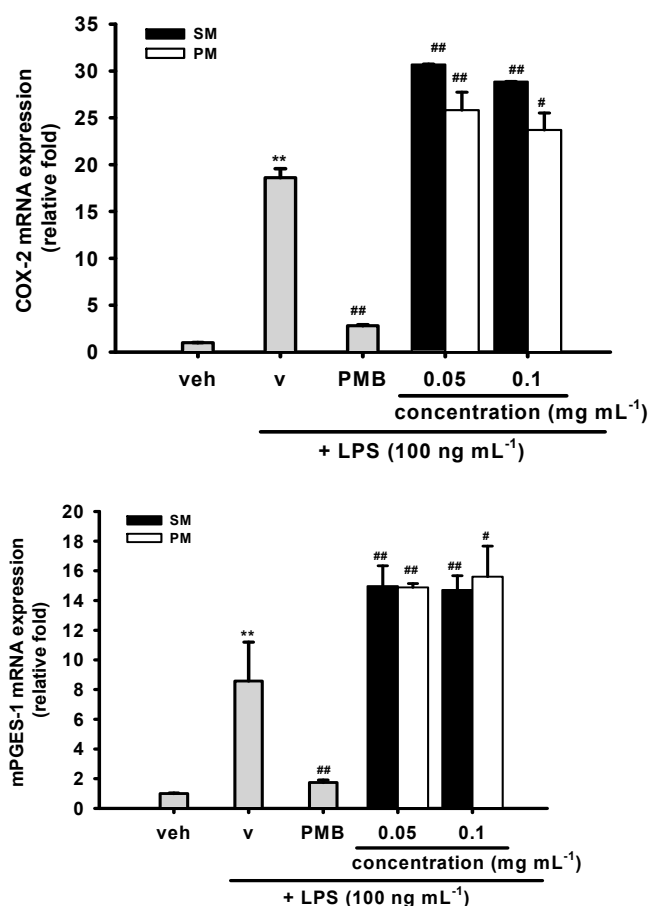

**Figure S1.** Effects of methanol fractions of seed shell and seed pomace on LPS-induced mRNA expression of COX-2 and mPGES-1. RAW 264.7 cells were treated with either vehicle (0.1% DMSO), LPS (100 ng/mL) in the presence of vehicle, polymyxin B (PMB, 10  $\mu$ g/mL), methanol fraction of seed shell (SM), or methanol fraction of seed pomace (PM) at the indicated concentrations for 12 h. Total RNA was prepared and the mRNA levels of COX-2 and mPGES-1 were quantified by RT-Q-PCR relative to  $\beta$ -actin, as described in Materials and Methods. Data represent the mean  $\pm$  SD of three independent experiments. \*\*  $p < 0.01$  represents significant differences compared with the vehicle control (without LPS). #  $p < 0.05$ ; ##  $p < 0.01$  represent significant differences compared with the LPS-treated vehicle.
